# Supplementary material
Source: PubMed Central journal article supplement (PMC5248999)

SUPPLEMENTARY DATA

**Supplementary Table 1. Analysis of covariance (ANCOVA) for fat mass and 48-h energy expenditure in GLP-1R<sup>ΔNkx2.1cre</sup> vs. GLP-1R<sup>f/f</sup> mice.** ANCOVA was performed using the Mouse Metabolic Phenotyping Center (MMPC) web-based Multiple Linear Regression program (<http://www.mmpc.org/shared/regression.aspx>). The response variables were fat mass and average 48-h energy expenditure, and the covariates were total body mass and average 48-h food intake. Analyses were performed for chow diet and HFD studies where relevant. Data are presented as mean±SEM for n=8-15 mice per group.

| <b>Analysis of covariance (ANCOVA)</b>             |                   |                                       |                |
|----------------------------------------------------|-------------------|---------------------------------------|----------------|
| <b>Chow Diet</b>                                   |                   |                                       |                |
| <b>Response Variable = Fat Mass</b>                |                   |                                       |                |
| <b>Covariate = Total Body Mass</b>                 |                   |                                       |                |
|                                                    | <b>GLP-1R f/f</b> | <b>GLP-1R KD<sup>ΔNkx2.1cre</sup></b> | <b>p-value</b> |
| Overall Mean                                       | 3.44±0.314        | 2.54±0.351                            | 0.06642        |
| Group Means                                        | 3.43±0.314        | 2.56±0.351                            | 0.07735        |
| <b>Response Variable = 48-h Energy Expenditure</b> |                   |                                       |                |
| <b>Covariate = 48-h Food Intake</b>                |                   |                                       |                |
|                                                    | <b>GLP-1R f/f</b> | <b>GLP-1R KD<sup>ΔNkx2.1cre</sup></b> | <b>p-value</b> |
| Overall Mean                                       | 7.20±0.201        | 7.81±0.252                            | 0.0391         |
| Group Means                                        | 7.05±0.191        | 7.54±0.234                            | 0.0162         |
| <b>Response Variable = 48-h Energy Expenditure</b> |                   |                                       |                |
| <b>Covariate = Total Body Mass</b>                 |                   |                                       |                |
|                                                    | <b>GLP-1R f/f</b> | <b>GLP-1R KD<sup>ΔNkx2.1cre</sup></b> | <b>p-value</b> |
| Overall Mean                                       | 7.00±0.173        | 7.61±0.212                            | 0.03721        |
| Group Means                                        | 7.05±0.173        | 7.54±0.211                            | 0.04399        |
| <b>High Fat Diet</b>                               |                   |                                       |                |
| <b>Response Variable = 48-h Energy Expenditure</b> |                   |                                       |                |
| <b>Covariate = Total Body Mass</b>                 |                   |                                       |                |
|                                                    | <b>GLP-1R f/f</b> | <b>GLP-1R KD<sup>ΔNkx2.1cre</sup></b> | <b>p-value</b> |
| Overall Mean                                       | 9.25±0.213        | 10.56±0.242                           | 0.0007376      |
| Group Means                                        | 9.38±0.205        | 10.38±0.232                           | 0.0039170      |

SUPPLEMENTARY DATA

**Supplementary Figure 1. Chow diet-fed GLP-1RKD<sup>ΔNkx2.1cre</sup> mice exhibit elevated water intake but normal RER and locomotor activity compared to GLP-1R<sup>ff</sup> controls.** The values are mean±SEM and represent cumulative 48-h water intake, RER and locomotor activity in chow diet-fed (A, D and G) GLP-1RKD<sup>ΔNkx2.1cre</sup> (n=10), (B, E and H) GLP-1RKD<sup>ΔPOMCcre</sup> (n=10) and (C, F and I) GLP-1RKD<sup>ΔSim1cre</sup> (n=11) mice compared to GLP-1R<sup>ff</sup> controls (n=12-15). Locomotor activity is expressed as cumulative distance traveled. \*p<0.05 vs. GLP-1R<sup>ff</sup>.

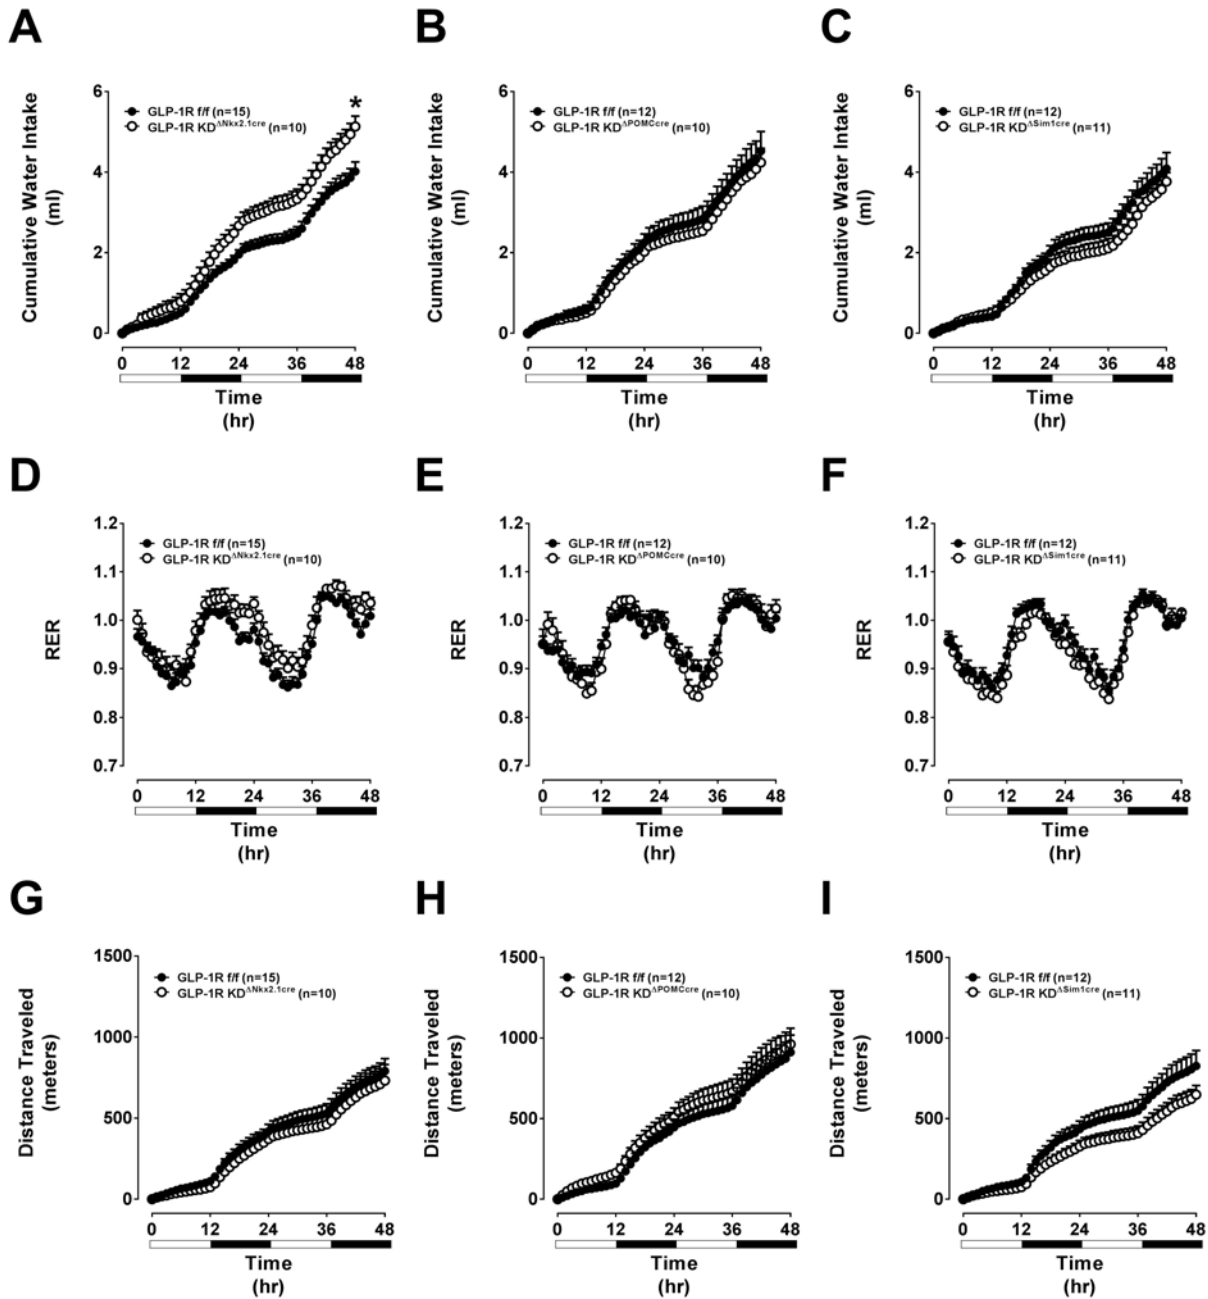

SUPPLEMENTARY DATA

**Supplementary Figure 2. HFD-fed GLP-1R KD<sup>ΔNkx2.1cre</sup> mice exhibit elevated water intake but normal RER and locomotor compared to GLP-1R<sup>fl/fl</sup> controls.** The values are mean±SEM and represent cumulative 48-h water intake, RER and locomotor activity in HFD-fed (A, D and G) GLP-1R KD<sup>ΔNkx2.1cre</sup> (n=11), (B, E and H) GLP-1R KD<sup>ΔPOMCcre</sup> (n=8) and (C, F and I) GLP-1R KD<sup>ΔSim1cre</sup> (n=11) mice compared to GLP-1R<sup>fl/fl</sup> controls (n=12-14). Locomotor activity is expressed as cumulative distance traveled. \*p<0.05 vs. GLP-1R<sup>fl/fl</sup>.

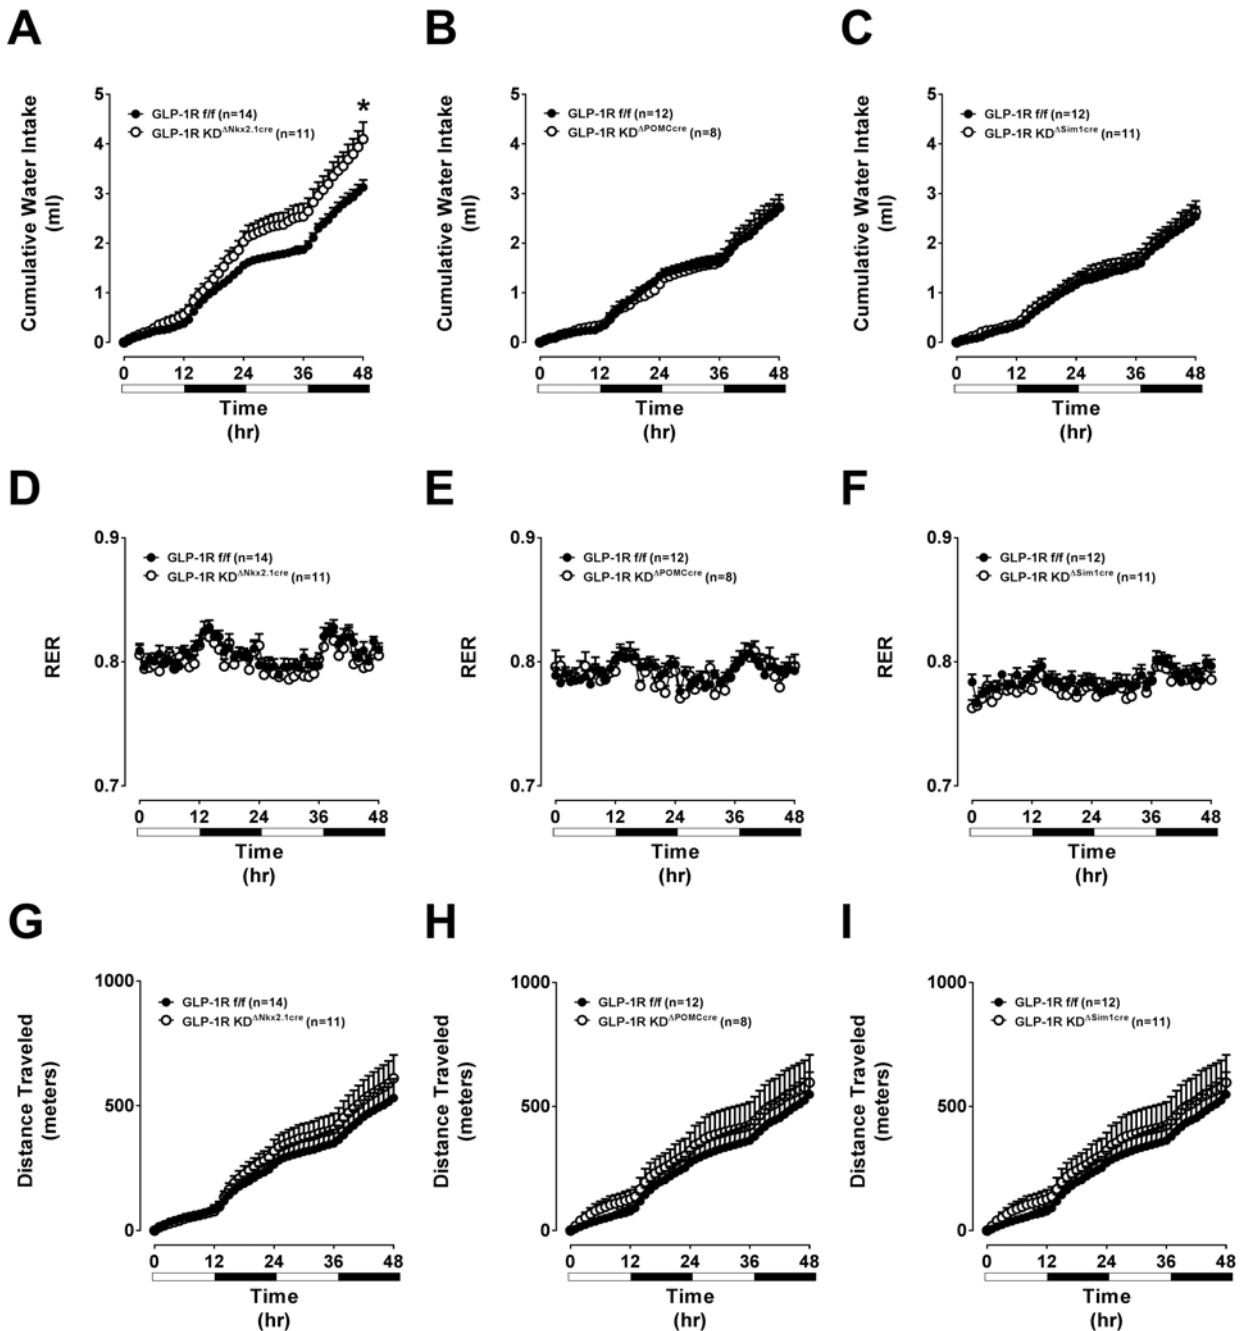

Supplement: DB161102SupplementaryData.pdf [file DB161102SupplementaryData.pdf]
